# Supplementary material for: Depression and Objectively Measured Physical Activity: A Systematic Review and Meta-Analysis
Source: Int J Environ Res Public Health. 2020 May 25;17(10):3738. doi: 10.3390/ijerph17103738 (PMC7277615; doi:10.3390/ijerph17103738)
Supplement: Supplementary file 1 [file ijerph-17-03738-s001.pdf]

# Depression and Objectively Measured Physical Activity: A Systematic Review and Meta-Analysis

Vincenza Gianfredi, Lorenzo Blandi, Stefano Cacitti, Mirko Minelli, Carlo Signorelli, Andrea Amerio and Anna Odone

**Supplementary Table S1.** Search strategy in PubMed/MEDLINE.

| SET | PubMed                                      |
|-----|---------------------------------------------|
| 1   | "Patient Health Questionnaire"[Mesh]        |
| 2   | "Depressive Disorder, Major"[Mesh]          |
| 3   | "Dysthymic Disorder"[Mesh]                  |
| 4   | "Depressive Disorder"[Mesh]                 |
| 5   | "Depression"[Mesh]                          |
| 6   | depression[Title/Abstract]                  |
| 7   | depressive[Title/Abstract]                  |
| 8   | PHQ[Title/Abstract]                         |
| 9   | Sets 1-8 were combined with "OR"            |
| 10  | "Screen Time"[Mesh]                         |
| 11  | "Exercise"[Mesh]                            |
| 12  | "Sports"[Mesh]                              |
| 13  | "Leisure Activities"[Mesh]                  |
| 14  | "Sitting Position"[Mesh]                    |
| 15  | "Supine Position"[Mesh]                     |
| 16  | "Sedentary Behavior"[Mesh]                  |
| 17  | ("Walking"[Mesh]                            |
| 18  | "Walking Speed"[Mesh]                       |
| 19  | "Bicycling"[Mesh]                           |
| 20  | "Endurance Training"[Mesh]                  |
| 21  | "Movement"[Mesh]                            |
| 22  | Movement*[Title/Abstract]                   |
| 23  | sport*[Title/Abstract]                      |
| 24  | physical activity[Title/Abstract]           |
| 25  | physical activities[Title/Abstract]         |
| 26  | physical exercise[Title/Abstract]           |
| 27  | physical exercises[Title/Abstract]          |
| 28  | walking[Title/Abstract]                     |
| 29  | stepping[Title/Abstract]                    |
| 30  | sitting[Title/Abstract]                     |
| 31  | Sets 9-30 were combined with "OR"           |
| 32  | "Ergometry"[Mesh]                           |
| 33  | "Physical Endurance"[Mesh]                  |
| 34  | "Accelerometry"[Mesh]                       |
| 35  | pedometer*[Title/Abstract]                  |
| 36  | device*[Title/Abstract]                     |
| 37  | "quantitative measurement"[Title/Abstract]  |
| 38  | "quantitative measurements"[Title/Abstract] |
| 39  | "objective measurement"[Title/Abstract]     |

|                                                       |                                            |
|-------------------------------------------------------|--------------------------------------------|
| 40                                                    | "objective measurements"[Title/Abstract]   |
| 41                                                    | "objectively measured"[Title/Abstract]     |
| 42                                                    | Set 32-41 were combined with "OR"          |
| 43                                                    | "Review" [Publication Type]                |
| 44                                                    | "Review Literature as Topic"[Mesh]         |
| 45                                                    | review[Title/Abstract]                     |
| 46                                                    | "Meta-Analysis" [Publication Type]         |
| 47                                                    | "Meta-Analysis as Topic"[Mesh]             |
| 48                                                    | "Network Meta-Analysis"[Mesh]              |
| 49                                                    | "Infant, Newborn"[Mesh]                    |
| 50                                                    | "Infant"[Mesh]                             |
| 51                                                    | "Child"[Mesh]                              |
| 52                                                    | child[Title/Abstract]                      |
| 53                                                    | children[Title/Abstract]                   |
| 54                                                    | infant*[Title/Abstract]))                  |
| 55                                                    | "Depression, Postpartum"[Mesh]             |
| 56                                                    | Sets 43-55 were combined with "OR"         |
| 57                                                    | Sets 9, 31 and 42 were combined with "AND" |
| 58                                                    | Sets 57 and 56 were combined with "NOT"    |
| 59                                                    | Set 58 was limited to English language     |
| Grey lines show how the listed keywords were combined |                                            |

**Supplementary Table S2.** Assessment of risk of bias for trials, using The Cochrane Collaboration's tool.

| Author year                    | Selection | Performance * | Detection * | Attrition | Reporting |
|--------------------------------|-----------|---------------|-------------|-----------|-----------|
| Abedi et al. 2015              | Low       | High          | High        | Low       | Low       |
| Freitas et al. 2018            | Low       | High          | High        | Low       | Low       |
| Golsteijn et al. 2018          | Low       | High          | High        | Low       | Low       |
| Hallam et al. 2018             | High      | High          | High        | High      | Low       |
| Hartescu et al. 2015           | Low       | High          | High        | Low       | Low       |
| Hospes et al. 2009             | Low       | High          | High        | Low       | Low       |
| Van der Berg-Emons et al. 2004 | Low       | High          | High        | Low       | Low       |
| Vetrovsky et al. 2017          | High      | High          | High        | Low       | Low       |

In physical activity interventional studies neither participants and researchers could be blinded, due to study design.
